# Supplementary material for: Identification of primary sclerosing cholangitis: ICD-10 code validation and comparison with a large language model approach
Source: Research Square preprint supplement (doi:10.21203/rs.3.rs-9152968/v1), 2026-04-01
Supplement: Supplementary file 1 [file f1ad90de5b1c5d31e4961b9b.docx]

**Supplemental Materials**

**Supplementary Table 1.**

| **Diagnosis** | **ICD-10 code** |
| --- | --- |
| Autoimmune Hepatitis | K73.0, K73.1, K73.2, K73.8, K73.9, K75.4 |
| Crohn’s Disease | K50, K50.0, K50.00, K50.01, K50.011, K50.012, K50.013, K50.014, K50.018, K50.019, K50.1, K50.10, K50.11, K50.111, K50.112, K50.113, K50.114, K50.118, K50.119, K50.8, K50.80, K50.81, K50.811, K50.812, K50.813, K50.814, K50.818, K50.819, K50.9, K50.90, K50.91, K50.911, K50.912, K50.913, K50.914, K50.918, K50.919 |
| Cholangiocarcinoma | C22.1, C24.0, C24.8, C24.9 |
| Cholangitis | K80.3, K80.30, K80.31, K80.32, K80.33, K80.34, K80.35, K80.36, K80.37, K83.0, K83.01, K83.09 |
| Cirrhosis | K70.30, K70.31, K72.10, K72.11, K74.4, K74.5, K74.6, K74.60, K74.69 |
| Colorectal cancer | C18.0, C18.1, C18.2, C18.3, C18.4, C18.5, C18.6, C18.7, C18.8, C18.9, C21.8, C78.5, C78.6, D37.0, D37.01, D37.02, D37.03, D37.030, D37.031, D37.032, D37.039, D37.04, D37.05, D37.09, D37.1, D37.2, D37.3, D37.4, D37.5, D37.6, D37.8, D37.9 |
| Hepatocellular carcinoma | C18.0, C18.1, C18.2, C18.3, C18.4, C18.5, C18.6, C18.7, C18.8, C18.9, C21.8, C78.5, C78.6, D37.0, D37.01, D37.02, D37.03, D37.030, D37.031, D37.032, D37.039, D37.04, D37.05, D37.09, D37.1, D37.2, D37.3, D37.4, D37.5, D37.6, D37.8, D37.9 |
| Primary Biliary Cholangitis | K74.3 |
| Ulcerative Colitis | K51, K51.0, K51.00, K51.01, K51.011, K51.012, K51.013, K51.014, K51.018, K51.019, K51.2, K51.20, K51.21, K51.211, K51.212, K51.213, K51.214, K51.218, K51.219, K51.3, K51.30, K51.31, K51.311, K51.312, K51.313, K51.314, K51.318, K51.319, K51.4, K51.40, K51.41, K51.411, K51.412, K51.413, K51.414, K51.418, K51.419, K51.5, K51.50, K51.51, K51.511, K51.512, K51.513, K51.514, K51.518, K51.519, K51.8, K51.80, K51.81, K51.811, K51.812, K51.813, K51.814, K51.818, K51.819, K51.9, K51.90, K51.91, K51.911, K51.912, K51.913, K51.914, K51.918, K51.919 |

**Supplementary Text 1.**

Final Prompt used for OpenAI’s GPT-4o:

"You are a clinical researcher with expertise in hepatology and data extraction from chart review. Your job is to manually summarize and extract information from hepatology outpatient doctor notes. I will provide you the notes section of hepatology outpatient doctor notes for you to summarize and extract data from. The input data will be given in the following order: patient ID, mrn, note ID, service date, and plan notes.

Please summarize and extract for the following details

1. mrn

2. psc_llm.

Please review the note and identify if the patient has a diagnosis or presumed diagnosis of psc or 'primary sclerosing cholangitis.' A patient with a presumed diagnosis of psc or 'primary sclerosing cholangitis' includes a patient with frequency of colonoscopy every 1 to 2 years or treatment with ursodiol without a diagnosis of primary biliary cholangitis or 'pbc.' Give the format as 0 for no and 1 for yes.

Please give the output only in csv format with the following column headers to organize the data: mrn, psc_llm. You do not need to list the headers in each response, just the extracted value in the above format. I would like to copy and paste the output directly into a spreadsheet software."
